# Supplementary material
Source: PubMed Central journal article supplement (PMC5135276)
Supplement: jciinsight-1-90301-s001.pdf [file jciinsight-1-90301-s001.pdf]

**Supplemental Table 1. Pro-fibrotic signaling pathways predicted to be regulated by the 20 downregulated microRNAs in BOS.**

| <b>KEGG analysis</b>                        | <b>Adjusted <i>p</i></b> |
|---------------------------------------------|--------------------------|
| Pathways in cancer                          | 7.21e-46                 |
| MAPK signaling pathway                      | 3.16e-31                 |
| Wnt signaling pathway                       | 2.07e-29                 |
| Focal adhesion                              | 2.87e-25                 |
| Regulation of actin cytoskeleton            | 2.17e-23                 |
| Axon guidance                               | 2.72e-23                 |
| Endocytosis                                 | 1.32e-21                 |
| Insulin signaling pathway                   | 7.90e-21                 |
| Neurotrophin signaling pathway              | 1.01e-18                 |
| Ubiquitin mediated proteolysis              | 2.00e-17                 |
| ErbB signaling pathway                      | 3.65e-16                 |
| Melanogenesis                               | 4.58e-16                 |
| Adherens junction                           | 1.30e-15                 |
| Pancreatic cancer                           | 2.03e-15                 |
| Renal cell carcinoma                        | 2.03e-15                 |
| TGF-beta signaling pathway                  | 3.66e-15                 |
| Chronic myeloid leukemia                    | 8.54e-15                 |
| Prostate cancer                             | 2.96e-14                 |
| Glioma                                      | 7.79e-14                 |
| Oocyte meiosis                              | 1.17e-13                 |
| Colorectal cancer                           | 1.10e-12                 |
| Tight junction                              | 2.24e-12                 |
| Long-term potentiation                      | 5.53e-12                 |
| Calcium signaling pathway                   | 8.27e-12                 |
| Basal cell carcinoma                        | 1.58e-11                 |
| Protein processing in endoplasmic reticulum | 2.84e-11                 |
| Melanoma                                    | 4.95e-11                 |
| GnRH signaling pathway                      | 5.45e-11                 |
| Non-small cell lung cancer                  | 6.85e-11                 |
| Cell cycle                                  | 8.01e-11                 |
| Phosphatidylinositol signaling system       | 1.03e-10                 |
| Gastric acid secretion                      | 1.36e-10                 |
| Hedgehog signaling pathway                  | 1.56e-10                 |
| Small cell lung cancer                      | 1.94e-10                 |
| Chemokine signaling pathway                 | 2.75e-10                 |
| Metabolic pathways                          | 3.64e-10                 |
| Fc gamma R-mediated phagocytosis            | 6.17e-10                 |
| Vascular smooth muscle contraction          | 6.32e-10                 |
| Cell adhesion molecules (CAMs)              | 6.32e-10                 |
| Endometrial cancer                          | 1.14e-09                 |
| mTOR signaling pathway                      | 1.14e-09                 |
| Progesterone-mediated oocyte maturation     | 1.17e-09                 |
| Gap junction                                | 3.89e-09                 |
| T cell receptor signaling pathway           | 5.69e-09                 |
| Acute myeloid leukemia                      | 8.53e-09                 |
| Cytokine-cytokine receptor interaction      | 9.97e-09                 |

|                                                            |          |
|------------------------------------------------------------|----------|
| Osteoclast differentiation                                 | 9.97e-09 |
| Hepatitis C                                                | 9.97e-09 |
| p53 signaling pathway                                      | 1.22e-08 |
| Chagas disease (American trypanosomiasis)                  | 3.27e-08 |
| Jak-STAT signaling pathway                                 | 5.31e-08 |
| Long-term depression                                       | 1.16e-07 |
| Adipocytokine signaling pathway                            | 3.09e-07 |
| SNARE interactions in vesicular transport                  | 8.12e-07 |
| Aldosterone-regulated sodium reabsorption                  | 1.38e-06 |
| Glycerophospholipid metabolism                             | 1.66e-06 |
| B cell receptor signaling pathway                          | 1.97e-06 |
| RIG-I-like receptor signaling pathway                      | 2.99e-06 |
| mRNA surveillance pathway                                  | 3.24e-06 |
| ECM-receptor interaction                                   | 5.02e-06 |
| Epithelial cell signaling in Helicobacter pylori infection | 5.66e-06 |
| Inositol phosphate metabolism                              | 5.83e-06 |
| Salivary secretion                                         | 1.13e-05 |
| Shigellosis                                                | 1.67e-05 |
| Fc epsilon RI signaling pathway                            | 1.77e-05 |
| Arrhythmogenic right ventricular cardiomyopathy (ARVC)     | 2.20e-05 |
| Circadian rhythm - mammal                                  | 2.79e-05 |
| VEGF signaling pathway                                     | 3.30e-05 |
| Bacterial invasion of epithelial cells                     | 3.31e-05 |
| Bladder cancer                                             | 3.58e-05 |
| Leukocyte transendothelial migration                       | 4.01e-05 |
| Toxoplasmosis                                              | 5.61e-05 |
| Vasopressin-regulated water reabsorption                   | 6.25e-05 |
| Dorso-ventral axis formation                               | 6.44e-05 |
| Apoptosis                                                  | 7.65e-05 |
| Neuroactive ligand-receptor interaction                    | 9.25e-05 |
| Hypertrophic cardiomyopathy (HCM)                          | 0.0001   |
| Dilated cardiomyopathy                                     | 0.0001   |
| RNA transport                                              | 0.0002   |
| Pancreatic secretion                                       | 0.0002   |
| N-Glycan biosynthesis                                      | 0.0002   |
| Notch signaling pathway                                    | 0.0005   |
| RNA degradation                                            | 0.0005   |
| Thyroid cancer                                             | 0.0005   |
| Type II diabetes mellitus                                  | 0.0007   |
| Glycerolipid metabolism                                    | 0.0009   |

**Supplemental Table 2. Predicted signaling pathways regulated by miR-323a-3p.**

| <b>KEGG analysis</b>                             | <b>Adjusted <i>p</i></b> |
|--------------------------------------------------|--------------------------|
| Pathways in cancer                               | 6.43e-08                 |
| Axon guidance                                    | 2.48e-05                 |
| Endocytosis                                      | 3.73e-05                 |
| Long-term potentiation                           | 5.00e-05                 |
| TGF-beta signaling pathway                       | 0.0002                   |
| Wnt signaling pathway                            | 0.0002                   |
| Chronic myeloid leukemia                         | 0.0003                   |
| Cell cycle                                       | 0.0003                   |
| Melanogenesis                                    | 0.0003                   |
| Pancreatic cancer                                | 0.0003                   |
| Prostate cancer                                  | 0.0007                   |
| MAPK signaling pathway                           | 0.0007                   |
| Colorectal cancer                                | 0.0007                   |
| Gap junction                                     | 0.0007                   |
| GnRH signaling pathway                           | 0.0011                   |
| Protein processing in endoplasmic reticulum      | 0.0011                   |
| Renal cell carcinoma                             | 0.0011                   |
| Ubiquitin mediated proteolysis                   | 0.0011                   |
| Regulation of actin cytoskeleton                 | 0.0015                   |
| Adherens junction                                | 0.0015                   |
| Oocyte meiosis                                   | 0.0018                   |
| mTOR signaling pathway                           | 0.0018                   |
| Vascular smooth muscle contraction               | 0.0022                   |
| Neurotrophin signaling pathway                   | 0.0037                   |
| Insulin signaling pathway                        | 0.0059                   |
| Long-term depression                             | 0.0059                   |
| Chagas disease (American trypanosomiasis)        | 0.0059                   |
| RIG-I-like receptor signaling pathway            | 0.0060                   |
| Glycosaminoglycan biosynthesis - heparan sulfate | 0.0123                   |
| ErbB signaling pathway                           | 0.0124                   |
| Progesterone-mediated oocyte maturation          | 0.0124                   |
| Non-small cell lung cancer                       | 0.0124                   |
| Acute myeloid leukemia                           | 0.0143                   |
| Rheumatoid arthritis                             | 0.0143                   |
| Melanoma                                         | 0.0300                   |
| Focal adhesion                                   | 0.0300                   |
| Gastric acid secretion                           | 0.0326                   |
| Antigen processing and presentation              | 0.0347                   |
| Aldosterone-regulated sodium reabsorption        | 0.0347                   |
| Bladder cancer                                   | 0.0347                   |
| Phosphatidylinositol signaling system            | 0.0353                   |
| Cytokine-cytokine receptor interaction           | 0.0363                   |
| Vasopressin-regulated water reabsorption         | 0.0364                   |
| mRNA surveillance pathway                        | 0.0405                   |
| Small cell lung cancer                           | 0.0427                   |
| Salivary secretion                               | 0.0476                   |
| Glycerolipid metabolism                          | 0.0476                   |
